# Supplementary material for: Epidemiology of acute kidney injury in intensive care units in Beijing: the multi-center BAKIT study
Source: Springer Nature journal article supplement (doi:10.1186/s12882-019-1660-z), 2019-12-01
Supplement: MOESM3 [file 17691554]

## 表 1 人口学资料、诊断及伴随疾病

### 1 人口学资料:

- 1.1 出生日期: □□□□/□□/□□(年/月/日)
- 1.2 性别: 男 女
- 1.3 民族: 汉 其他 (请注明)
- 1.4 身高: □□□cm
- 1.5 体重: □□□kg
- 1.6 医疗费用种类: 医疗保险 公费医疗 新农合 医疗保险 (一老一小) 自费 其他 (请注明) \_\_\_\_\_

### 2 入院及入 ICU 情况

- 2.1 入院时间: □□□□/□□/□□ (年/月/日)
- 2.2 主要入院诊断:
- 2.3 入 ICU 时间: □□□□/□□/□□:□□(年/月/日/24 小时制时间)
- 2.4 转入 ICU 情况: 计划内转入 (至少提前 12 小时)  
非计划内转入
- 2.5 转入科室: 急诊 病房 术后转入 (以术后监护治疗为目的) 本院其他 ICU 外院
- 2.6 入 ICU 主要原因及并发症 (可多选):
  - 手术后治疗及监护 呼吸系统疾病
  - 心跳/呼吸骤停后 消化系统疾病
  - 心血管系统疾病 中枢神经系统疾病

- 中毒或药物过量
- 创伤
- 内分泌和代谢性疾病
- 其他（请注明）

3 入 ICU 时主要脏器损害（可多选）

- 呼吸衰竭
- 梗阻性休克
- 心源性休克
- DIC
- 低容量休克
- 急性肝衰竭
- 感染性休克
- 其他（请注明）

4 入 ICU 时手术情况： 未手术  择期手术  急诊手术

4.1 手术种类

- 心脏手术
- 消化道手术
- 胸部手术
- 肾脏手术
- 脊椎及脊髓手术
- 其他腹部手术
- 四肢手术
- 颅脑及神经系统手术
- 移植手术（ 肝脏  心脏  骨髓  胰腺）
- 其他手术（请注明）

5 基础血肌酐：  $\mu\text{mol/L}$  或   $\text{mg/dl}$ （患者入 ICU 前 3 个月内最低血肌酐值，若入 ICU 前 3 个月未做过化验，可参照工作手册中的表格查找基础血肌酐参考值。）

6 伴随情况（可多选）

- 恶性肿瘤
- 血液系统恶性肿瘤

- 转移癌
- 高血压
- 心功能 IV 级
- COPD
- 慢性肝脏病
- 冠心病
- 艾滋病
- 免疫功能损害
- 慢性肾脏病（伴肾功能不全）
- 慢性肾脏病（不伴肾功能不全）
- 糖尿病 胰岛素治疗 非胰岛素治疗

7 入 ICU 前使用以下药物（可多选） 是 否

7.1 2 周内曾经使用 是 否

- 氨基糖甙类抗生素
- 两性霉素 B
- 糖肽类抗生素
- 甘露醇
- 造影剂
- 血管活性药物（不含扩血管类）

7.2 3 个月内曾经使用 是 否

非甾体抗炎药（NSAID） ACE-I/ARB 他汀类降脂药

8 患者家属联系方式（如有） \_\_\_\_\_

表 2 入 ICU 首个 24 小时

- 1 生命体征
  - 1.1 心率<sup>①</sup>: 最低值□□□次/分 最高值□□□次/分
  - 1.2 收缩压<sup>②</sup>: 最低值□□□mmHg 或□□.□kPa
  - 1.3 平均动脉压<sup>③</sup>: 最低值□□□mmHg 或□□.□kPa  
最高值□□□mmHg 或□□.□kPa
  - 1.4 体温<sup>④</sup>: 最低值□□.□℃ 最高值□□.□℃
  - 1.5 呼吸频率<sup>⑤</sup>: 最低值□□次/分 最高值□□次/分
- 2 实验室检查
  - 2.1 血气分析 (同一次)
    - 2.1.1 pH 值<sup>①</sup> (最低值): □.□□□
    - 2.1.2 PaCO<sub>2</sub><sup>②</sup>: □□□mmHg
    - 2.1.3 PaO<sub>2</sub><sup>③</sup>: □□□mmHg
    - 2.1.4 HCO<sub>3</sub><sup>-④</sup>: □□.□mmol/L
  - 2.2 血常规
    - 2.2.1 白细胞<sup>①</sup>: 最低值□□.□×10<sup>9</sup>/L 最高值□□.□×10<sup>9</sup>/L
    - 2.2.2 红细胞压积<sup>②</sup>: 最低值□□.□%
    - 2.2.3 血小板<sup>③</sup>: 最低值□□□×10<sup>9</sup>/L 最高值□□□×10<sup>9</sup>/L
  - 2.3 血生化肝肾功
    - 2.3.1 血清钾<sup>①</sup>: 最低值□.□□mmol/L  
最高值□.□□mmol/L
    - 2.3.2 血清钠<sup>②</sup>: 最低值□□□.□mmol/L

最高值□□□.□mmol/L

2.3.3 尿素氮<sup>①</sup>：最高值□□.□mmol/L 或□.□□mg/dl

2.3.4 肌酐<sup>②</sup>：最高值□□□.□μmol/L 或□□.□mg/dl

2.3.5 总胆红素<sup>③</sup>：最高值□□□.□μmol/L 或□□.□mg/dl

2.4 尿量<sup>④</sup>（请填写在表 3 的尿量记录中，参照护理记录按相应时间点填写）

2.5 GCS 评分<sup>⑤</sup>：□□分

2.6 机械通气<sup>⑥</sup>（有创）：□是 □否

2.7 吸入氧浓度(FiO<sub>2</sub>)<sup>⑦</sup> 0. □□（以小数计，非机械通气时参照工作手册选择）

2.8 应用血管活性药物<sup>⑧</sup>：□是 □否

2.8.1 多巴胺（最高剂量）：□无 □≤5μg/kg/min  
□>5 且≤15μg/kg/min □>15μg/kg/min

2.8.2 肾上腺素（最高剂量）：□无 □≤0.1μg/kg/min  
□>0.1μg/kg/min

2.8.3 去甲肾上腺素（最高剂量）：□无 □≤0.1μg/kg/min  
□>0.1μg/kg/min

2.8.4 使用多巴酚丁胺：□是 □否

3 已打分者可**直接填写分值**，并尽可能提供原始打分表。未打的分不用自行打，请**填写标注该分数编号的项目即可**。

① APACHE II \_\_\_\_\_ ② SOFA \_\_\_\_\_ ③ SAPS II \_\_\_\_\_

表 3 ICU 每日数据

| 入 ICU 天数                           |                   | 1                                                        | 2                                                        | 3                                                        | 4                                                        | 5                                                        | 6                                                        | 7                                                        | 8                                                        | 9                                                        | 10                                                       |
|------------------------------------|-------------------|----------------------------------------------------------|----------------------------------------------------------|----------------------------------------------------------|----------------------------------------------------------|----------------------------------------------------------|----------------------------------------------------------|----------------------------------------------------------|----------------------------------------------------------|----------------------------------------------------------|----------------------------------------------------------|
| 日期                                 |                   | 月日                                                       | 月日                                                       | 月日                                                       | 月日                                                       | 月日                                                       | 月日                                                       | 月日                                                       | 月日                                                       | 月日                                                       | 月日                                                       |
| 肌酐<br>最高值                          | $\mu\text{mol/L}$ |                                                          |                                                          |                                                          |                                                          |                                                          |                                                          |                                                          |                                                          |                                                          |                                                          |
|                                    | $\text{mg/dL}$    |                                                          |                                                          |                                                          |                                                          |                                                          |                                                          |                                                          |                                                          |                                                          |                                                          |
| 24 小时液体平衡 (ml)                     |                   |                                                          |                                                          |                                                          |                                                          |                                                          |                                                          |                                                          |                                                          |                                                          |                                                          |
| 行 RRT (肾脏替代治疗)                     |                   | <input type="checkbox"/> 是<br><input type="checkbox"/> 否 | <input type="checkbox"/> 是<br><input type="checkbox"/> 否 | <input type="checkbox"/> 是<br><input type="checkbox"/> 否 | <input type="checkbox"/> 是<br><input type="checkbox"/> 否 | <input type="checkbox"/> 是<br><input type="checkbox"/> 否 | <input type="checkbox"/> 是<br><input type="checkbox"/> 否 | <input type="checkbox"/> 是<br><input type="checkbox"/> 否 | <input type="checkbox"/> 是<br><input type="checkbox"/> 否 | <input type="checkbox"/> 是<br><input type="checkbox"/> 否 | <input type="checkbox"/> 是<br><input type="checkbox"/> 否 |
| $\text{PaO}_2 / \text{FiO}_2$ mmHg |                   |                                                          |                                                          |                                                          |                                                          |                                                          |                                                          |                                                          |                                                          |                                                          |                                                          |
| 机械通气                               |                   | <input type="checkbox"/> 是<br><input type="checkbox"/> 否 | <input type="checkbox"/> 是<br><input type="checkbox"/> 否 | <input type="checkbox"/> 是<br><input type="checkbox"/> 否 | <input type="checkbox"/> 是<br><input type="checkbox"/> 否 | <input type="checkbox"/> 是<br><input type="checkbox"/> 否 | <input type="checkbox"/> 是<br><input type="checkbox"/> 否 | <input type="checkbox"/> 是<br><input type="checkbox"/> 否 | <input type="checkbox"/> 是<br><input type="checkbox"/> 否 | <input type="checkbox"/> 是<br><input type="checkbox"/> 否 | <input type="checkbox"/> 是<br><input type="checkbox"/> 否 |
| 血小板<br>$\times 10^9/\text{L}$      | 最低值               |                                                          |                                                          |                                                          |                                                          |                                                          |                                                          |                                                          |                                                          |                                                          |                                                          |
|                                    | 最高值               |                                                          |                                                          |                                                          |                                                          |                                                          |                                                          |                                                          |                                                          |                                                          |                                                          |
| 总胆红素                               | $\mu\text{mol/L}$ |                                                          |                                                          |                                                          |                                                          |                                                          |                                                          |                                                          |                                                          |                                                          |                                                          |
|                                    | $\text{mg/dL}$    |                                                          |                                                          |                                                          |                                                          |                                                          |                                                          |                                                          |                                                          |                                                          |                                                          |
| 平均动脉压<br>$\text{mmHg/kPa}$         | 最低值               |                                                          |                                                          |                                                          |                                                          |                                                          |                                                          |                                                          |                                                          |                                                          |                                                          |
|                                    | 最高值               |                                                          |                                                          |                                                          |                                                          |                                                          |                                                          |                                                          |                                                          |                                                          |                                                          |
| GCS 评分                             |                   |                                                          |                                                          |                                                          |                                                          |                                                          |                                                          |                                                          |                                                          |                                                          |                                                          |

Page 6: daily information of serum creatinine, fluid balance, treatment including mechanical ventilation and RRT, other laboratory results, vital signs, GCS score

| 入 ICU 天数                            | 1                                                                                                                                                            | 2                                                                                                                                                            | 3                                                                                                                                                            | 4                                                                                                                                                            | 5                                                                                                                                                            | 6                                                                                                                                                            | 7                                                                                                                                                            | 8                                                                                                                                                            | 9                                                                                                                                                            | 10                                                                                                                                                           |                                                                                                                                  |
|-------------------------------------|--------------------------------------------------------------------------------------------------------------------------------------------------------------|--------------------------------------------------------------------------------------------------------------------------------------------------------------|--------------------------------------------------------------------------------------------------------------------------------------------------------------|--------------------------------------------------------------------------------------------------------------------------------------------------------------|--------------------------------------------------------------------------------------------------------------------------------------------------------------|--------------------------------------------------------------------------------------------------------------------------------------------------------------|--------------------------------------------------------------------------------------------------------------------------------------------------------------|--------------------------------------------------------------------------------------------------------------------------------------------------------------|--------------------------------------------------------------------------------------------------------------------------------------------------------------|--------------------------------------------------------------------------------------------------------------------------------------------------------------|----------------------------------------------------------------------------------------------------------------------------------|
| 当日多巴胺最高剂量<br>μg/kg/min              | <input type="checkbox"/> 无<br><input type="checkbox"/> ≤5<br><input type="checkbox"/> >5<br>且≤15<br><input type="checkbox"/> >15                             | <input type="checkbox"/> 无<br><input type="checkbox"/> ≤5<br><input type="checkbox"/> >5<br>且≤15<br><input type="checkbox"/> >15                             | <input type="checkbox"/> 无<br><input type="checkbox"/> ≤5<br><input type="checkbox"/> >5<br>且≤15<br><input type="checkbox"/> >15                             | <input type="checkbox"/> 无<br><input type="checkbox"/> ≤5<br><input type="checkbox"/> >5<br>且≤15<br><input type="checkbox"/> >15                             | <input type="checkbox"/> 无<br><input type="checkbox"/> ≤5<br><input type="checkbox"/> >5<br>且≤15<br><input type="checkbox"/> >15                             | <input type="checkbox"/> 无<br><input type="checkbox"/> ≤5<br><input type="checkbox"/> >5<br>且≤15<br><input type="checkbox"/> >15                             | <input type="checkbox"/> 无<br><input type="checkbox"/> ≤5<br><input type="checkbox"/> >5<br>且≤15<br><input type="checkbox"/> >15                             | <input type="checkbox"/> 无<br><input type="checkbox"/> ≤5<br><input type="checkbox"/> >5<br>且≤15<br><input type="checkbox"/> >15                             | <input type="checkbox"/> 无<br><input type="checkbox"/> ≤5<br><input type="checkbox"/> >5<br>且≤15<br><input type="checkbox"/> >15                             | <input type="checkbox"/> 无<br><input type="checkbox"/> ≤5<br><input type="checkbox"/> >5<br>且≤15<br><input type="checkbox"/> >15                             | <input type="checkbox"/> 无<br><input type="checkbox"/> ≤5<br><input type="checkbox"/> >5<br>且≤15<br><input type="checkbox"/> >15 |
| 当日肾上腺素最高剂量<br>μg/kg/min             | <input type="checkbox"/> 无<br><input type="checkbox"/> ≤0.1<br><input type="checkbox"/> >0.1                                                                 | <input type="checkbox"/> 无<br><input type="checkbox"/> ≤0.1<br><input type="checkbox"/> >0.1                                                                 | <input type="checkbox"/> 无<br><input type="checkbox"/> ≤0.1<br><input type="checkbox"/> >0.1                                                                 | <input type="checkbox"/> 无<br><input type="checkbox"/> ≤0.1<br><input type="checkbox"/> >0.1                                                                 | <input type="checkbox"/> 无<br><input type="checkbox"/> ≤0.1<br><input type="checkbox"/> >0.1                                                                 | <input type="checkbox"/> 无<br><input type="checkbox"/> ≤0.1<br><input type="checkbox"/> >0.1                                                                 | <input type="checkbox"/> 无<br><input type="checkbox"/> ≤0.1<br><input type="checkbox"/> >0.1                                                                 | <input type="checkbox"/> 无<br><input type="checkbox"/> ≤0.1<br><input type="checkbox"/> >0.1                                                                 | <input type="checkbox"/> 无<br><input type="checkbox"/> ≤0.1<br><input type="checkbox"/> >0.1                                                                 | <input type="checkbox"/> 无<br><input type="checkbox"/> ≤0.1<br><input type="checkbox"/> >0.1                                                                 | <input type="checkbox"/> 无<br><input type="checkbox"/> ≤0.1<br><input type="checkbox"/> >0.1                                     |
| 当日去甲肾上腺素最高剂量<br>μg/kg/min           | <input type="checkbox"/> 无<br><input type="checkbox"/> ≤0.1<br><input type="checkbox"/> >0.1                                                                 | <input type="checkbox"/> 无<br><input type="checkbox"/> ≤0.1<br><input type="checkbox"/> >0.1                                                                 | <input type="checkbox"/> 无<br><input type="checkbox"/> ≤0.1<br><input type="checkbox"/> >0.1                                                                 | <input type="checkbox"/> 无<br><input type="checkbox"/> ≤0.1<br><input type="checkbox"/> >0.1                                                                 | <input type="checkbox"/> 无<br><input type="checkbox"/> ≤0.1<br><input type="checkbox"/> >0.1                                                                 | <input type="checkbox"/> 无<br><input type="checkbox"/> ≤0.1<br><input type="checkbox"/> >0.1                                                                 | <input type="checkbox"/> 无<br><input type="checkbox"/> ≤0.1<br><input type="checkbox"/> >0.1                                                                 | <input type="checkbox"/> 无<br><input type="checkbox"/> ≤0.1<br><input type="checkbox"/> >0.1                                                                 | <input type="checkbox"/> 无<br><input type="checkbox"/> ≤0.1<br><input type="checkbox"/> >0.1                                                                 | <input type="checkbox"/> 无<br><input type="checkbox"/> ≤0.1<br><input type="checkbox"/> >0.1                                                                 | <input type="checkbox"/> 无<br><input type="checkbox"/> ≤0.1<br><input type="checkbox"/> >0.1                                     |
| 应用多巴酚丁胺                             | <input type="checkbox"/> 是<br><input type="checkbox"/> 否                                                                                                     | <input type="checkbox"/> 是<br><input type="checkbox"/> 否                                                                                                     | <input type="checkbox"/> 是<br><input type="checkbox"/> 否                                                                                                     | <input type="checkbox"/> 是<br><input type="checkbox"/> 否                                                                                                     | <input type="checkbox"/> 是<br><input type="checkbox"/> 否                                                                                                     | <input type="checkbox"/> 是<br><input type="checkbox"/> 否                                                                                                     | <input type="checkbox"/> 是<br><input type="checkbox"/> 否                                                                                                     | <input type="checkbox"/> 是<br><input type="checkbox"/> 否                                                                                                     | <input type="checkbox"/> 是<br><input type="checkbox"/> 否                                                                                                     | <input type="checkbox"/> 是<br><input type="checkbox"/> 否                                                                                                     |                                                                                                                                  |
| 以下利尿剂应用<br>1 呋塞米<br>2 托拉塞米<br>3 丁尿酸 | <input type="checkbox"/> 无<br><input type="checkbox"/> 1<br><input type="checkbox"/> 2<br><input type="checkbox"/> 3<br><input type="checkbox"/> 其他<br>(请注明) | <input type="checkbox"/> 无<br><input type="checkbox"/> 1<br><input type="checkbox"/> 2<br><input type="checkbox"/> 3<br><input type="checkbox"/> 其他<br>(请注明) | <input type="checkbox"/> 无<br><input type="checkbox"/> 1<br><input type="checkbox"/> 2<br><input type="checkbox"/> 3<br><input type="checkbox"/> 其他<br>(请注明) | <input type="checkbox"/> 无<br><input type="checkbox"/> 1<br><input type="checkbox"/> 2<br><input type="checkbox"/> 3<br><input type="checkbox"/> 其他<br>(请注明) | <input type="checkbox"/> 无<br><input type="checkbox"/> 1<br><input type="checkbox"/> 2<br><input type="checkbox"/> 3<br><input type="checkbox"/> 其他<br>(请注明) | <input type="checkbox"/> 无<br><input type="checkbox"/> 1<br><input type="checkbox"/> 2<br><input type="checkbox"/> 3<br><input type="checkbox"/> 其他<br>(请注明) | <input type="checkbox"/> 无<br><input type="checkbox"/> 1<br><input type="checkbox"/> 2<br><input type="checkbox"/> 3<br><input type="checkbox"/> 其他<br>(请注明) | <input type="checkbox"/> 无<br><input type="checkbox"/> 1<br><input type="checkbox"/> 2<br><input type="checkbox"/> 3<br><input type="checkbox"/> 其他<br>(请注明) | <input type="checkbox"/> 无<br><input type="checkbox"/> 1<br><input type="checkbox"/> 2<br><input type="checkbox"/> 3<br><input type="checkbox"/> 其他<br>(请注明) | <input type="checkbox"/> 无<br><input type="checkbox"/> 1<br><input type="checkbox"/> 2<br><input type="checkbox"/> 3<br><input type="checkbox"/> 其他<br>(请注明) |                                                                                                                                  |

ICU 每日数据——尿量 (ml)

| 时间<br>入 ICU<br>天数 | 8<br>am | 9<br>am | 10<br>am | 11<br>am | 12<br>n | 13<br>pm | 14<br>pm | 15<br>pm | 16<br>pm | 17<br>pm | 18<br>pm | 19<br>pm | 20<br>pm | 21<br>pm | 22<br>pm | 23<br>pm | 24<br>pm | 1<br>am | 2<br>am | 3<br>am | 4<br>am | 5<br>am | 6<br>am | 7<br>am |  |
|-------------------|---------|---------|----------|----------|---------|----------|----------|----------|----------|----------|----------|----------|----------|----------|----------|----------|----------|---------|---------|---------|---------|---------|---------|---------|--|
| 1                 |         |         |          |          |         |          |          |          |          |          |          |          |          |          |          |          |          |         |         |         |         |         |         |         |  |
| 2                 |         |         |          |          |         |          |          |          |          |          |          |          |          |          |          |          |          |         |         |         |         |         |         |         |  |
| 3                 |         |         |          |          |         |          |          |          |          |          |          |          |          |          |          |          |          |         |         |         |         |         |         |         |  |
| 4                 |         |         |          |          |         |          |          |          |          |          |          |          |          |          |          |          |          |         |         |         |         |         |         |         |  |
| 5                 |         |         |          |          |         |          |          |          |          |          |          |          |          |          |          |          |          |         |         |         |         |         |         |         |  |
| 6                 |         |         |          |          |         |          |          |          |          |          |          |          |          |          |          |          |          |         |         |         |         |         |         |         |  |
| 7                 |         |         |          |          |         |          |          |          |          |          |          |          |          |          |          |          |          |         |         |         |         |         |         |         |  |
| 8                 |         |         |          |          |         |          |          |          |          |          |          |          |          |          |          |          |          |         |         |         |         |         |         |         |  |
| 9                 |         |         |          |          |         |          |          |          |          |          |          |          |          |          |          |          |          |         |         |         |         |         |         |         |  |
| 10                |         |         |          |          |         |          |          |          |          |          |          |          |          |          |          |          |          |         |         |         |         |         |         |         |  |

几点记录的尿量就填写在几点。请在时间表中标注“+”表示转入 ICU，标注“-”表示转出或死亡。



## 表 4 AKI

### 1. AKI 诱因（可多选）

- 应用肾毒性药物（诊断 AKI 前 72 小时内）
- 氨基糖甙类抗生素
- 糖肽类抗生素
- 两性霉素 B
- 造影剂
- 非甾体抗炎药物(NSAID's)
- ACEI/ARB
- 其他（请注明）
- 脓毒症（sepsis）
- 低血容量
- 低心排
- 肝肾综合征
- 肾后性梗阻

### 3. 本次住 ICU 肾功能最差分级：无 AKI R I F

表 5 肾脏替代治疗 (RRT)

1. 肾脏替代治疗 (RRT) 开始日期: □□□□/□□/□□ (年/月/日)
2. 开始肾脏替代治疗 (RRT) 原因 (可多选)
- |                                         |                                   |
|-----------------------------------------|-----------------------------------|
| <input type="checkbox"/> 无尿/少尿          | <input type="checkbox"/> 严重代谢性酸中毒 |
| <input type="checkbox"/> 高钾血症           | <input type="checkbox"/> 严重脏器水肿   |
| <input type="checkbox"/> 高钠/低钠血症        | <input type="checkbox"/> 药物过量     |
| <input type="checkbox"/> 其他 (请说明) _____ |                                   |
3. 穿刺管路种类:  双腔血滤管     三腔血滤管
4. 穿刺部位
- |                                 |                                         |
|---------------------------------|-----------------------------------------|
| <input type="checkbox"/> 左颈内静脉  | <input type="checkbox"/> 右颈内静脉          |
| <input type="checkbox"/> 左股静脉   | <input type="checkbox"/> 右股静脉           |
| <input type="checkbox"/> 左锁骨下静脉 | <input type="checkbox"/> 右锁骨下静脉         |
| <input type="checkbox"/> A-V 瘘  | <input type="checkbox"/> 其他 (请注明) _____ |
5. 初始治疗模式
- |                                 |                                         |
|---------------------------------|-----------------------------------------|
| <input type="checkbox"/> CVVH   | <input type="checkbox"/> IHD            |
| <input type="checkbox"/> CVVHD  | <input type="checkbox"/> SCUF           |
| <input type="checkbox"/> CVVHDF | <input type="checkbox"/> SLED           |
| <input type="checkbox"/> HVHF   | <input type="checkbox"/> 其他 (请注明) _____ |
6. 主要治疗模式 (最长时间)
- |                                 |                               |
|---------------------------------|-------------------------------|
| <input type="checkbox"/> CVVH   | <input type="checkbox"/> IHD  |
| <input type="checkbox"/> CVVHD  | <input type="checkbox"/> SCUF |
| <input type="checkbox"/> CVVHDF | <input type="checkbox"/> SLED |

- HVHF 其他（请注明）\_\_\_\_\_
- 7 初始抗凝方式
- 无抗凝 低分子肝素
- 普通肝素 枸橼酸钠
- 普通肝素+鱼精蛋白 其他（请注明）\_\_\_\_\_
- 8 主要抗凝方式（最长时间）
- 无抗凝 低分子肝素
- 普通肝素 枸橼酸钠
- 普通肝素+鱼精蛋白 其他（请注明）\_\_\_\_\_
- 9 置换液输入方式（CVVH 及 CVVHDF 时填写）
- 前稀释 后稀释 前稀释+后稀释
- 10 出血 有 无
- 10.1 出血部位（可多选）
- 穿刺部位出血或渗血 颅内出血
- 皮肤瘀紫或瘀斑 气道出血
- 消化道出血 其他部位（请注明）\_\_\_\_\_
- 10.2 出血与抗凝剂相关性
- 无关 有关 可能有关

## 表 6 全身性感染或脓毒症 (Sepsis)

1. Sepsis (诊断标准见工作手册) 发生时间  
从未发生    入 ICU 时    入 ICU 后
2. sepsis 部位  

|                               |                                         |
|-------------------------------|-----------------------------------------|
| <input type="checkbox"/> 呼吸系统 | <input type="checkbox"/> 泌尿系统           |
| <input type="checkbox"/> 胃肠道  | <input type="checkbox"/> 皮肤软组织          |
| <input type="checkbox"/> 腹腔   | <input type="checkbox"/> 神经系统           |
| <input type="checkbox"/> 血流感染 | <input type="checkbox"/> 其他 (请注明) _____ |
- 3 院内获得性感染 (感染发生在入院>48h 后): 是 否
- 4 sepsis 与 AKI 发生: 无关    有关    可能有关

## 表 7 预后

- 1 决定撤销生命支持治疗：是 否
  - 1.1 决定撤销生命支持治疗时间：/ (年/月/日)
- 2 ICU 预后及参数
  - 2.1 转出 ICU 时存活：是 否
  - 2.2 转出 ICU/死亡时间：/ (年/月/日)
  - 2.3 转出 ICU 血肌酐（离转出 ICU 最近时间点的血肌酐）：  
.□ $\mu\text{mol/L}$  或 .□ $\text{mg/dL}$
  - 2.4 转出 ICU 前 24 小时尿量：  $\text{ml}/24\text{h}$
  - 2.5 转出 ICU 时仍需要肾脏替代治疗：是 否
    - 2.5.1 肾脏替代治疗方式  
IHD PD 其他（请注明）
- 3 28 天预后
  - 3.1 入 ICU 后第 28 天存活：是 否
  - 3.2 第 28 天血肌酐（离第 28 天最近时间点的血肌酐）：  
.□ $\mu\text{mol/L}$  或 .□ $\text{mg/dL}$
  - 3.3 第 28 天仍需要肾脏替代治疗：是 否
    - 3.3.1 肾脏替代治疗方式：
 

|                                 |                                       |
|---------------------------------|---------------------------------------|
| <input type="checkbox"/> CVVH   | <input type="checkbox"/> SLED         |
| <input type="checkbox"/> CVVHD  | <input type="checkbox"/> IHD          |
| <input type="checkbox"/> CVVHDF | <input type="checkbox"/> PD           |
| <input type="checkbox"/> SCUF   | <input type="checkbox"/> 其他（请注明）_____ |

4 住院预后

4.1 出院时存活：是 否

4.2 出院/死亡时间：// (年/月/日)

4.3 出院时血肌酐（离出院最近时间点肌酐）：

.  $\mu\text{mol/L}$  或 .  $\text{mg/dL}$

4.4 出院时仍需要肾脏替代治疗：是 否

4.4.1 肾脏替代治疗方式：

IHD PD 其他（请注明）\_\_\_\_\_

5 ICU 住院总费用：. (万元)
